# Supplementary material
Source: PubMed Central journal article supplement (PMC8482641)
Supplement: NIHMS1656410-supplement-1656410_Sup_fig1_disscusion.pdf [file NIHMS1656410-supplement-1656410_Sup_fig1_disscusion.pdf]

## Supplementary Information

### Table of contents

- **Supplementary Tables Legends** ..... page 2
- **Supplementary Figure 1** ..... page 3
- **Supplementary Discussion** ..... page 4

## Supplementary Information

**Supplementary Table 1.** Description of mouse models and experimental conditions analyzed in genome-wide profiling experiments (RNA-seq, ATAC-seq and scATAC-seq datasets).

**Supplementary Table 2.** Dynamic peaks between regenerating (*Injury*), early neoplastic (*Kras\**, *Kras\*+Injury*) or malignant (*PDAC*) epithelial states versus normal counterparts (*Normal*), identified by ATAC-seq in lineage-traced pancreatic epithelial cells isolated from C, KC, KP<sup>fl</sup>C-GEMMs or organoid-transplant models, including clustering-based peak annotation of injury and/or mutant *Kras*-sensitive loci displayed in Extended Data Fig. 2a.

**Supplementary Table 3.** Pathway enrichment analysis of genes associated with injury and/or mutant *Kras*-sensitive ATAC-seq clusters.

**Supplementary Table 4.** Differentially expressed genes (DEGs) between *Kras* wild-type or *Kras*-mutant pancreatic epithelial cells expressing shBrd4.1448 vs shRen.713 (control) triggered to undergo regenerative metaplasia (C<sup>sh</sup>:*Injury*) or injury-accelerated neoplastic transformation (KC<sup>sh</sup>:*Kras\*+Injury*), respectively, as identified by RNA-seq analyses in lineage-traced (mKate2+;GFP+) cells. See Extended Data Figure 4a for experimental details.

**Supplementary Table 5.** DEGs between regenerating (*Injury*), early neoplastic (*Kras\**, *Kras\*+Injury*) or malignant (*PDAC*) epithelial states versus healthy normal counterparts (*Normal*), identified by RNA-seq analyses in pancreatic epithelial cells isolated from C, KC, KP<sup>fl</sup>C-GEMMs. Upregulated (UP), downregulated (DN) or non-differentially expressed (NS) genes in each tissue state are annotated depending whether they exhibit parallel by accessibility-*GAIN*, -*LOSS* or no accessibility change (NC) at associated loci in that same condition vs *Normal*.

**Supplementary Table 6.** Pathway enrichment analysis of ‘chromatin-dynamic’ or ‘chromatin-stable’ DEGs regenerating (*Injury*), early neoplastic (*Kras\**, *Kras\*+Injury*) or malignant (*PDAC*) epithelial states versus healthy normal pancreas (*Normal*), separated by ATAC-seq dynamics category. For each experimental tissue state, DEGs were classified into upregulated (UP) or downregulated (DN) categories, and then further subdivided depending whether associated peaks display significant chromatin accessibility -*GAIN*, -*LOSS*, or no change (NC) in that same condition vs *Normal*.

**Supplementary Table 7.** HOMER analyses of motifs enriched in dynamic cis-regulatory elements of ‘chromatin-dynamic DEGs’ between the indicated experimental conditions vs *Normal*. Numbers in brackets indicate the total number of peaks per category.

**Supplementary Table 8.** Subpopulation-defining peaks identified in single-cell ATAC-seq (scATAC-seq) analysis. Significantly scATAC-seq enriched peaks in the indicated cell subpopulations of mKate2+ cells isolated from from *Kras\** and *Kras\*+Injury* tissue states analyzed together. Subpopulations are labeled S1-S7, with numbers matching those shown in Extended Data Fig. 8b.

## Supplementary Information

### Supplementary Figure 1

#### a Basal Progression Cohort Samples (C; KC and KPfIC-GEMMs)

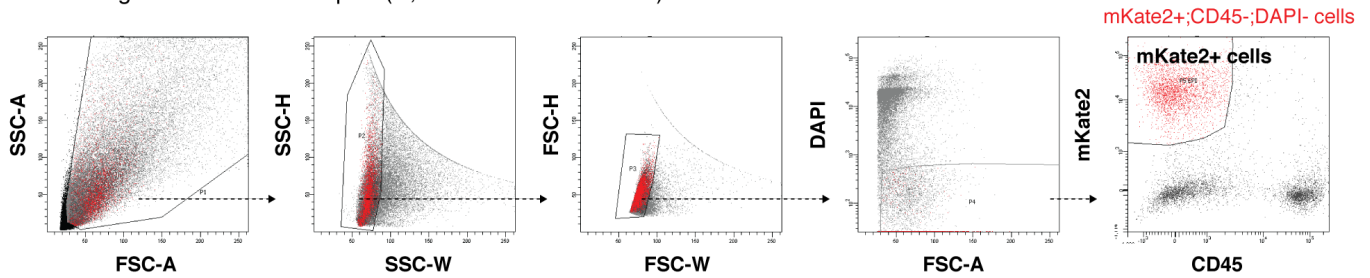

#### b Perturbation Cohort Samples (C<sup>sh</sup> and KC<sup>sh</sup> GEMMs)

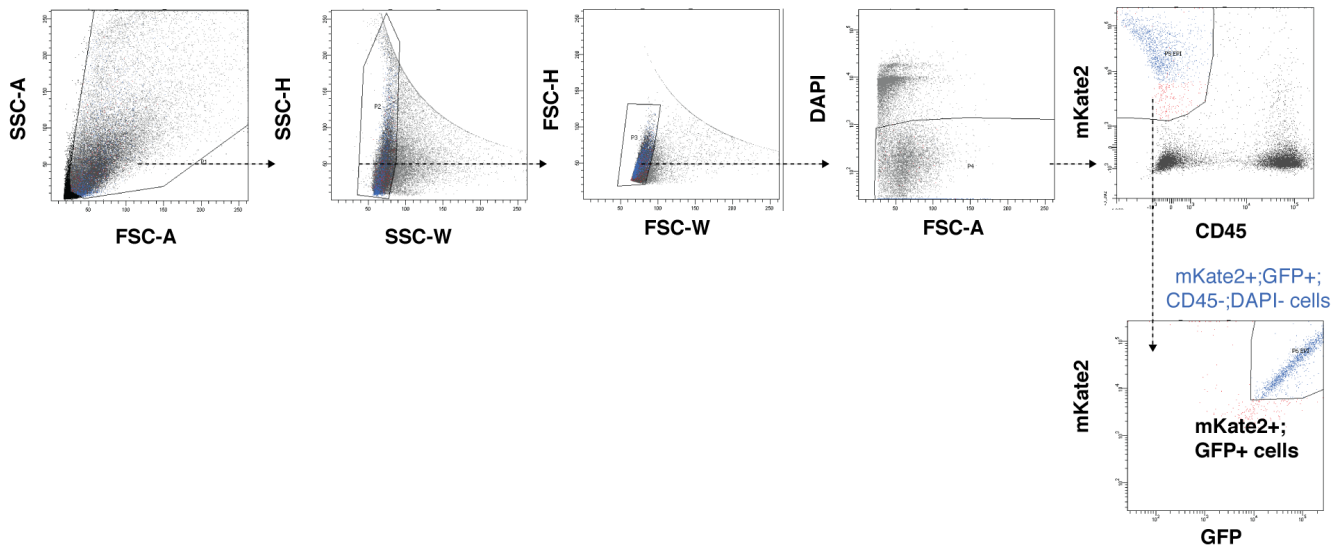

**Supplementary Figure 1. Gating strategies for flow cytometric experiments from genetically-engineered mice a,** Gating strategy for FACS sorting of mKate2+ pancreatic epithelial cells subjected to omics analyses presented in Fig. 1b-f; Fig. 3f; Fig. 4a,b,e-g; Fig. 5a,c-d; Extended Data Fig. 1c-e; Extended Data Fig. 2a-g; Extended Data Fig. 3a-c; Extended Data Fig. 7a-c, e, f; Extended Data Fig. 8a-l; Extended Data Fig. 9a-g; and Extended Data Fig. 10b-j, l. **b,** Gating strategy for FACS sorting of mKate2;GFP double-positive pancreatic epithelial cells expressing doxycycline-inducible shRNAs, for omics analyses presented in Fig. 2c; Fig. 3f; Fig. 4d; Fig. 5a; Extended Data Fig. 3f,g; Extended Data Fig. 6b-d, f-I, l,m; and Extended Data Fig. 7d.

## Supplementary Information

### Supplementary Discussion

Cancer initiation results from a complex interaction of genetic and environmental insults that triggers changes in cell identity and tissue state that resemble regenerative processes yet paradoxically lead to a neoplastic cell fate<sup>89-91</sup>. Despite its importance, the interplay between cancer-predisposing mutations and tissue damage has proven difficult to study, owing in part to the lack of experimentally tractable model systems. For example, while *in vitro* culture systems and transplantation models have provided valuable information on the genetic, genomic and epigenomic aberrations of cancer<sup>17,77,92</sup>, these systems cannot fully capture effects of environmental cues or tissue context in promoting (or restraining) neoplastic transformation. Alternatively, genome-wide profiling of tissue samples can provide molecular snapshots of tumors<sup>23,30,93</sup>, however the resulting data are correlative and do not establish functional significance<sup>94</sup>. To address these issues, we combined genomics, single-cell chromatin assays and spatiotemporally- controlled functional perturbations in autochthonous mouse models to dissect how normal epithelial homeostasis is subverted during carcinogenesis. Our approach revealed a cooperative interaction between gene mutation (oncogenic *Kras*) and environment insult (tissue injury) in shaping chromatin accessibility that produces an epigenetic state that is not accessible by injury alone, unleashes mutant *Kras* driven-pancreatic transformation, and defines advanced PDAC.

Several features of the cancer-associated chromatin states induced in the *Kras*-mutant pancreatic epithelium upon injury support their contribution to the neoplastic process. From a temporal perspective, they emerge remarkably fast (within 48 hours), at the onset of ADM and well before the appearance of widespread PanIN lesions. From a molecular perspective, they impact cis-regulatory elements of many established regulators of pancreas lineage specification, tumorigenesis and metastasis that remain otherwise unaltered in normal epithelium undergoing physiological regeneration. From a functional perspective, these divergent chromatin states are coupled with a distinctive rewiring of transcriptional programs, gene regulatory networks and Brd4 outputs that identified novel effectors of pancreatic tumorigenesis. Additionally, the incorporation of single-cell ATAC-seq allowed us to link these early chromatin accessibility changes identified in analyses of bulk populations to *bona fide* chromatin remodeling events leading to the emergence of neoplasia-specific epigenetic states *in vivo* and gene programs that define the human disease. Thus, while chromatin remodeling may facilitate metastatic competence and other late-stage traits of PDAC cells<sup>17,30,77</sup>, our results establish chromatin dysregulation as an early component of PDAC pathogenesis.

While normal differentiation programs restrain pancreatic metaplasia and are a potent tumor suppressive barrier for neoplasia and ultimately, malignancy<sup>22,81,95</sup>, our results provide substantially more granularity to these transitions. We identify a chromatin remodeling program that alters the accessible landscape of known master regulators of pancreatic epithelial cell fate that is unique to the neoplastic process and unleashes *Kras*' oncogenic potential. While acquisition of additional events (eg. alteration of tumor suppressor genes and/or chromatin modifiers) may confer *Ras*-mutant cells to acquire or sustain such oncogenic chromatin states cell-autonomously during the transition to invasive cancer<sup>37,92</sup>, inputs

## Supplementary Information

from the tissue environment (damage, pancreatitis) are sufficient to induce such changes in pre-malignancy. Their net result is an acinar-to-neoplasia chromatin switch that redirects reparative injury responses towards neoplasia.

Consistent with recent roles for the AP-1 dimeric complex in firing injury<sup>96</sup> and mutant Ras-responsive enhancers<sup>97</sup>, this altered response to injury is associated with a complex the transcriptional regulatory network characterized by a marked enrichment of AP-1 motifs in both regeneration- and cancer-associated loci. However, the differential expression of AP-1 subunits (FOS, ATF, JUN and MAF subfamilies) in normal, regenerating, pro-neoplastic and malignant epithelia inferred from our *in vivo* expression analyses suggest distinct AP-1 dimer configurations likely underlie regenerative<sup>98,99</sup> and pro-oncogenic<sup>13,100</sup> effects. While the activity of specific TFs that underlie these transitions currently relies on correlative results, a priority for future work will be to dissect both the *in vivo* composition of AP-1 dimers and their functional interplay with master lineage-specifying transcription factors during physiological versus pathological injury responses to identify the individual and/or collaborative TF pioneer activities directing each outcome. Along these lines, new drugs inhibiting specific of bromodomain chromatin readers that are differentially required for maintenance vs inducible gene expression<sup>101</sup> may serve as strategies to selectively perturb injury/Kras-responsive states without compromising normal, tumor suppressive differentiation programs.

Thus, while pancreatic carcinogenesis has long been viewed as a defect in regenerative processes<sup>10,102</sup>, our study provides molecular detail on what makes the neoplastic process unique. It reveals that gene-environment interactions act, at least in part, by promoting a large-scale reorganization of chromatin accessibility that explains why (and how) many aberrantly activated cell fate programs become engaged during PDAC development. It also uncovers new chromatin-activated effectors of mutant Kras and tissue damage such as the alarmin cytokine IL-33, which may, in turn, contribute to the poorly understood epithelial cell-autonomous inflammation that drives tumorigenesis<sup>103</sup>. IL-33 has both nuclear chromatin-binding and extracellular activities<sup>26</sup>. As the latter can elicit potent stromal and immune inflammatory reactions that are known to shape mutant Kras pancreatic epithelial cell states<sup>4,20</sup>, it is likely such tissue regulatory roles contribute to its effects on early neoplasia. Further study of gene – environment interactions relevant for cancer initiation will lay the groundwork for rational early diagnosis and interception strategies.

## Supplementary Discussion References

- 89 Dvorak, H. F. Tumors: wounds that do not heal. Similarities between tumor stroma generation and wound healing. *N Engl J Med* **315**, 1650-1659, doi:10.1056/NEJM198612253152606 (1986).
- 90 Roy, N. & Hebrok, M. Regulation of Cellular Identity in Cancer. *Dev Cell* **35**, 674-684, doi:10.1016/j.devcel.2015.12.001 (2015).
- 91 Flavahan, W. A., Gaskell, E. & Bernstein, B. E. Epigenetic plasticity and the hallmarks of cancer. *Science* **357**, doi:10.1126/science.aal2380 (2017).
- 92 Ge, Y. *et al.* Stem Cell Lineage Infidelity Drives Wound Repair and Cancer. *Cell* **169**, 636-650 e614, doi:10.1016/j.cell.2017.03.042 (2017).
- 93 Bailey, P. *et al.* Genomic analyses identify molecular subtypes of pancreatic cancer. *Nature* **531**, 47-52, doi:10.1038/nature16965 (2016).

## Supplementary Information

- 94 Stricker, S. H., Koflerle, A. & Beck, S. From profiles to function in epigenomics. *Nat Rev Genet* **18**, 51-66, doi:10.1038/nrg.2016.138 (2017).
- 95 Martinelli, P. *et al.* The acinar regulator Gata6 suppresses KrasG12V-driven pancreatic tumorigenesis in mice. *Gut* **65**, 476-486, doi:10.1136/gutjnl-2014-308042 (2016).
- 96 Wang, W. *et al.* Changes in regeneration-responsive enhancers shape regenerative capacities in vertebrates. *Science* **369**, doi:10.1126/science.aaz3090 (2020).
- 97 Martinez-Zamudio, R. I. *et al.* AP-1 imprints a reversible transcriptional programme of senescent cells. *Nat Cell Biol* **22**, 842-855, doi:10.1038/s41556-020-0529-5 (2020).
- 98 Fontana, X. *et al.* c-Jun in Schwann cells promotes axonal regeneration and motoneuron survival via paracrine signaling. *J Cell Biol* **198**, 127-141, doi:10.1083/jcb.201205025 (2012).
- 99 Florin, L. *et al.* Delayed wound healing and epidermal hyperproliferation in mice lacking JunB in the skin. *J Invest Dermatol* **126**, 902-911, doi:10.1038/sj.jid.5700123 (2006).
- 100 Mechta, F., Lallemand, D., Pfarr, C. M. & Yaniv, M. Transformation by ras modifies AP1 composition and activity. *Oncogene* **14**, 837-847, doi:10.1038/sj.onc.1200900 (1997).
- 101 Gilan, O. *et al.* Selective targeting of BD1 and BD2 of the BET proteins in cancer and immunoinflammation. *Science* **368**, 387-394, doi:10.1126/science.aaz8455 (2020).
- 102 Morris, J. P. t., Wang, S. C. & Hebrok, M. KRAS, Hedgehog, Wnt and the twisted developmental biology of pancreatic ductal adenocarcinoma. *Nat Rev Cancer* **10**, 683-695, doi:10.1038/nrc2899 (2010).
- 103 Todoric, J. & Karin, M. The Fire within: Cell-Autonomous Mechanisms in Inflammation-Driven Cancer. *Cancer Cell* **35**, 714-720, doi:10.1016/j.ccell.2019.04.001 (2019).
